# Supplementary material for: The 2D van der Waals heterojunction MoC@NG@CN for enhanced photocatalytic hydrogen production
Source: Royal Society of Chemistry journal article supplement (doi:10.1039/d2ta09841e), 2023-01-01
Supplement: d2ta09841e1.pdf [file d2ta09841e1.pdf]

## Supplementary information

### **The 2D Van der Waals heterojunction MoC@NG@CN for enhanced photocatalytic hydrogen production**

Mengxi Tan<sup>a,b</sup>, Chengye Yu<sup>a,b</sup>, Jiaqi Yao<sup>c</sup>, Qinyong Zhang<sup>c</sup>, Shengyu Kui<sup>c</sup>, Chuanbao Liu<sup>a,c</sup>,  
Wenjun Dong<sup>a,c</sup>, Huimin Meng<sup>b</sup>, Yanjing Su<sup>a,b</sup>, Lijie Qiao<sup>a,b</sup>, Yang Bai<sup>\*a,b</sup>

<sup>a</sup> Beijing Advanced Innovation Center for Materials Genome Engineering, University of Science and Technology Beijing, Beijing 100083, China

<sup>b</sup> Institute for Advanced Material and Technology, University of Science and Technology Beijing, Beijing 100083, China

<sup>c</sup> School of Materials Science and Engineering, University of Science and Technology Beijing, Beijing 100083, China

## 1. Experiment

### 1.1 Synthesis

All the chemicals were used without further purification. Triethanolamine (TEOA),  $\text{InCl}_3 \cdot 4\text{H}_2\text{O}$ ,  $\text{ZnCl}_2$  and  $(\text{NH}_4)_6\text{Mo}_7\text{O}_{24} \cdot 4\text{H}_2\text{O}$  were purchased from Aladdin Reagent Co., Ltd. Thioacetamide (TAA), glycerol ( $\text{C}_3\text{H}_8\text{O}_3$ ) and melamine ( $\text{C}_3\text{H}_6\text{N}_6$ ) were supplied by Beijing J&K Scientific Co., Ltd.

#### 1.1.1 Synthesis of MoC@NG

The samples of MoC@NG were synthesized by a simple solid-state reaction method. The 0.465 g  $(\text{NH}_4)_6\text{Mo}_7\text{O}_{24} \cdot 4\text{H}_2\text{O}$  and 2.0 g  $\text{C}_3\text{H}_6\text{N}_6$  were mechanically ground for 30 minutes. The obtained homogeneous mixture was calcined under  $\text{N}_2$  atmosphere at 500 °C for 2 h with a heating rate of 5 °C  $\text{min}^{-1}$ , and finally sintered at 800 °C for 120 min.

#### 1.1.2 Synthesis of g- $\text{C}_3\text{N}_4$

20 g urea was calcined at 550 °C for 3 h in a covered ceramic crucible with a heating rate of 2 °C  $\text{min}^{-1}$ . The yellow resultant bulk g- $\text{C}_3\text{N}_4$  was ground into fine powder. The g- $\text{C}_3\text{N}_4$  nanosheets were synthesized by thermal etching bulk g- $\text{C}_3\text{N}_4$ . The bulk g- $\text{C}_3\text{N}_4$  was placed in an open ceramic crucible and heated at 500 °C for 2 h with a heating rate of 5 °C  $\text{min}^{-1}$ . The obtained light-yellow samples were labeled as CN.

#### 1.1.3 Synthesis of MoC@NG@CN hybrid photocatalyst

240 mg CN was uniformly dispersed in 30 mL deionized water and sonicated for 30 minutes. Subsequently, a certain amount of MoC@NG was added and sonicated for 30 minutes. Finally, the suspension was stirred for 24 h. The samples were obtained by centrifugation and dried overnight in a vacuum drying oven at 60 °C. The prepared samples were labeled as MoC@NG-x@CN (x = 0, 50, 60, 70, 80, 90), and x represents the mass of MoC@NG (mg).

### 1.2 Characterization

The crystal structure of photocatalysts was analyzed by X-ray diffraction (XRD, Rigaku Ultima IV, Japan) using Cu K $\alpha$  radiation (40 kV, 40 mA). The microscopic morphology was

observed by field-emission scanning electron microscope (FE-SEM, SUPRA 55, Zeiss) and transmission electron microscope (TEM, JEM-2200FS, JEOL). Energy-dispersive X-ray spectroscopy (EDS) mapping was also obtained by TEM. The X-ray photoelectron spectra (XPS) were determined by an AXIS ULTRA DLD spectrometer using a monochromatic Al K $\alpha$  radiation ( $h\nu = 1486.6$  eV). The texture properties of samples were characterized by Brunauer-Emmett-Teller (BET, ASAP 2460). The Ultraviolet-visible diffuse reflectance spectra (UV-vis DRS) were measured with Shimadzu UV-2550. The steady-state photoluminescence (PL) spectra and time-resolved photoluminescence (TRPL) decay plots were implemented on the spectrophotometer (FLS980) with an excitation wavelength of 314 nm. A typical three-electrode cell using the CHI660E electrochemical workstation was employed to determine the photoelectrochemical performance. The photocatalysts (5 mg) were dispersed in an ethanol solution containing 10 vol% Nafion reagents. The mixed solution was uniformly deposited on a 1 cm  $\times$  1 cm FTO conductive glass as a working electrode, while the Pt sheets and Ag/AgCl electrodes were used as counter and reference electrodes, respectively, and 0.5 M Na<sub>2</sub>SO<sub>4</sub> aqueous solution was used as the electrolyte. The electron paramagnetic resonance (EPR) characterization: Endor spectrometer (JES-FA300, JEOL) was used for the characterization of EPR with 300 W Xenon lamp and a 420 nm cutoff filter at room temperature. For the test of  $\cdot\text{O}_2^-$ , 5 mg sample was dispersed into methanol (1 mL). Then, 5,5-dimethyl-1-pyrroline N-oxide (DMPO) was added to the mixture. Under light irradiation, the signals at 0 and 10 min were collected. For the test of  $h^+$ , 5 mg sample was dispersed into acetonitrile (1 mL), and then 2,2,6,6-tetramethylpiperidinoxy (TEMPO) was added into the mixture. Under light irradiation, the signals at 0 min and 10 min were collected.

### 1.3 Photocatalytic test

The photocatalytic hydrogen evolution experiments were carried out in a sealed quartz flask (50 mL). In a typical test, the photocatalysts (5 mg) were added into 20 mL 20 vol% TEOA aqueous solution with ultrasonic dispersion for 5 min. Subsequently, the 26  $\mu\text{L}$  H<sub>2</sub>PtCl<sub>6</sub> $\cdot$ 6H<sub>2</sub>O

aqueous solution (5 mg/mL) was added to the reaction solution. Before irradiation, the reactor was evacuated and filled with N<sub>2</sub> to ensure that it remained in an anaerobic condition. A 300 W Xenon lamp equipped with a UV cut-off filter ( $\lambda > 400$  nm) was adopted as a light source and was positioned about 10 cm away from the catalytic cell. After four hours of light exposure, the evolved H<sub>2</sub> was analyzed by a gas chromatograph (SHIMADZU GC-2014, TCD). The apparent quantum efficiency (AQE) was measured at monochromatic wavelengths (400 nm, 420 nm, 450 nm, 500 nm and 550 nm), and calculated according to the following equation:

$$\text{AQE} = \frac{N_e}{N_p} \times 100\% = \frac{2 \cdot N_{\text{H}_2} \cdot N_A \cdot h \cdot c}{W \cdot S \cdot t \cdot \lambda} \times 100\%$$

Where N<sub>e</sub> represents the number of electrons participating in the reaction, N<sub>p</sub> means the number of incident photons. N<sub>H<sub>2</sub></sub>, N<sub>A</sub>, h and c represent the number of evolved H<sub>2</sub> molecules, Avogadro constant, Planck constant and the speed of light. W, S, t and  $\lambda$  represent the irradiation intensity, the irradiation area, the reaction time and the wavelength of monochromatic light, respectively.

2. Figures

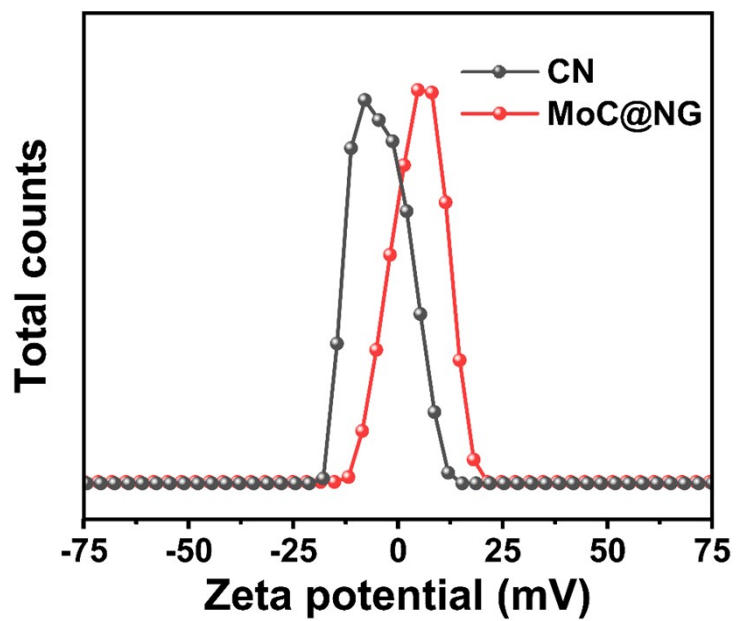

Fig. S1 Zeta potentials of CN and MoC@NG in deionized water at pH 7.

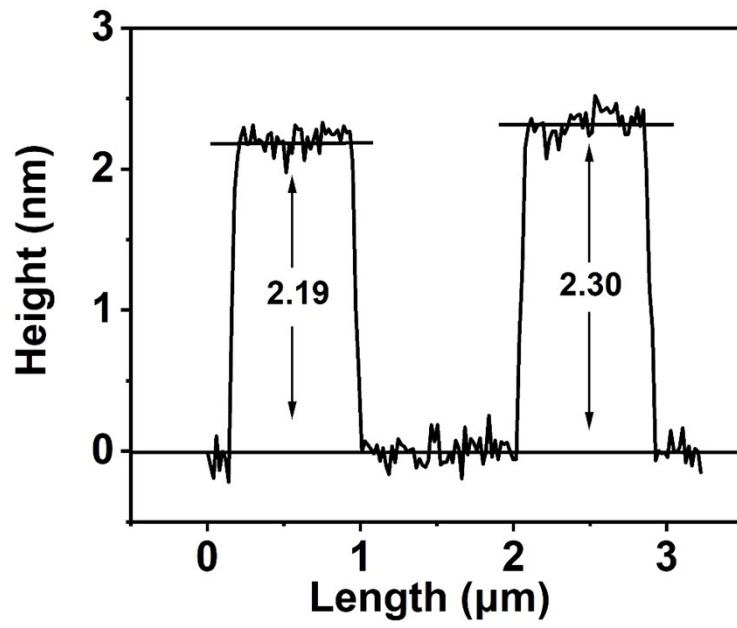

Fig. S2 The height spectra corresponding to the AFM image of MoC@NG-70@CN.

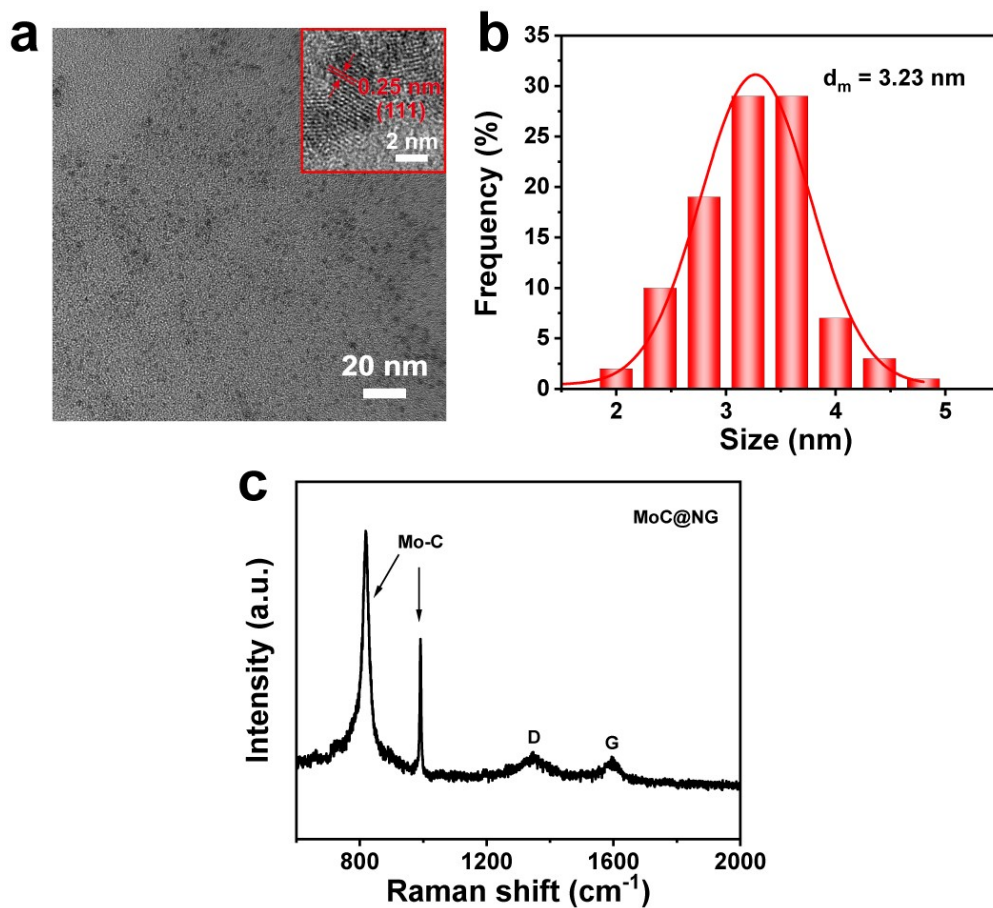

Fig. S3 (a) TEM image (the inset is the corresponding high-resolution TEM image); (b) the particle size distribution and (c) Raman spectrum of MoC@NG.

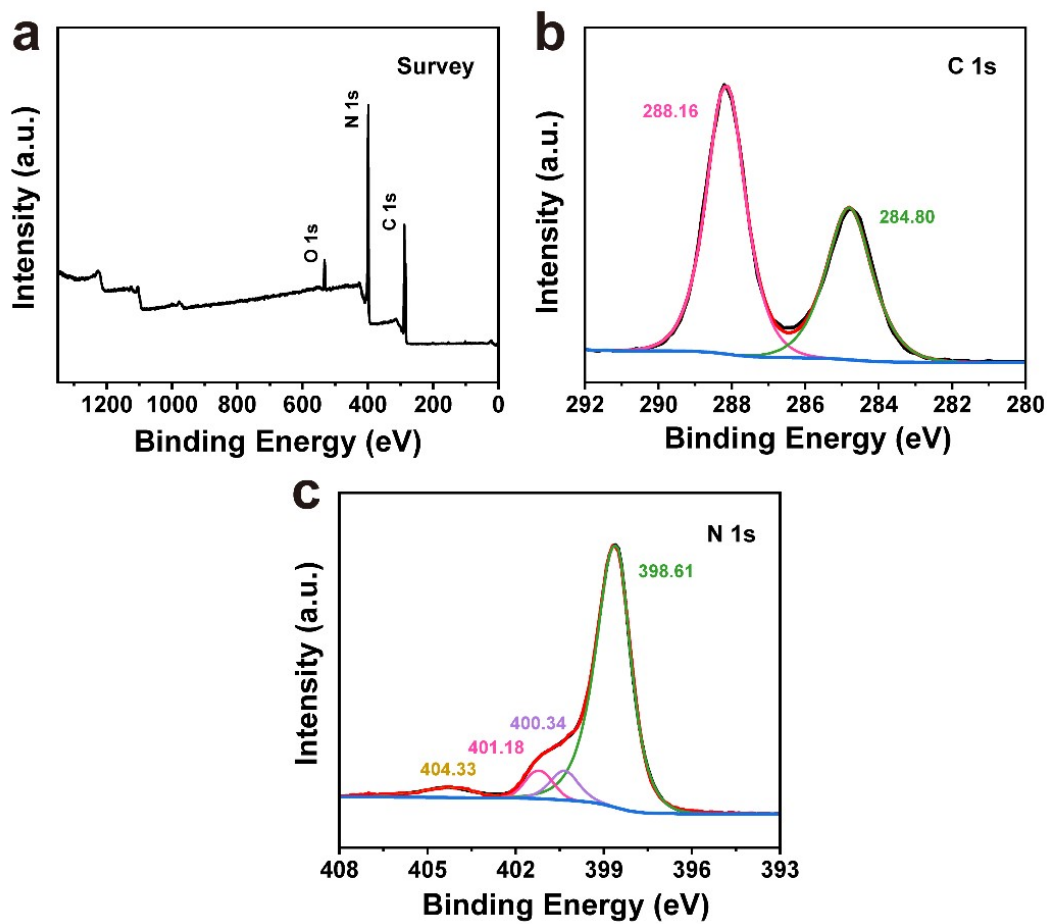

Fig. S4 The XPS spectra of (a) survey, (b) C 1s, (c) N 1s for CN.



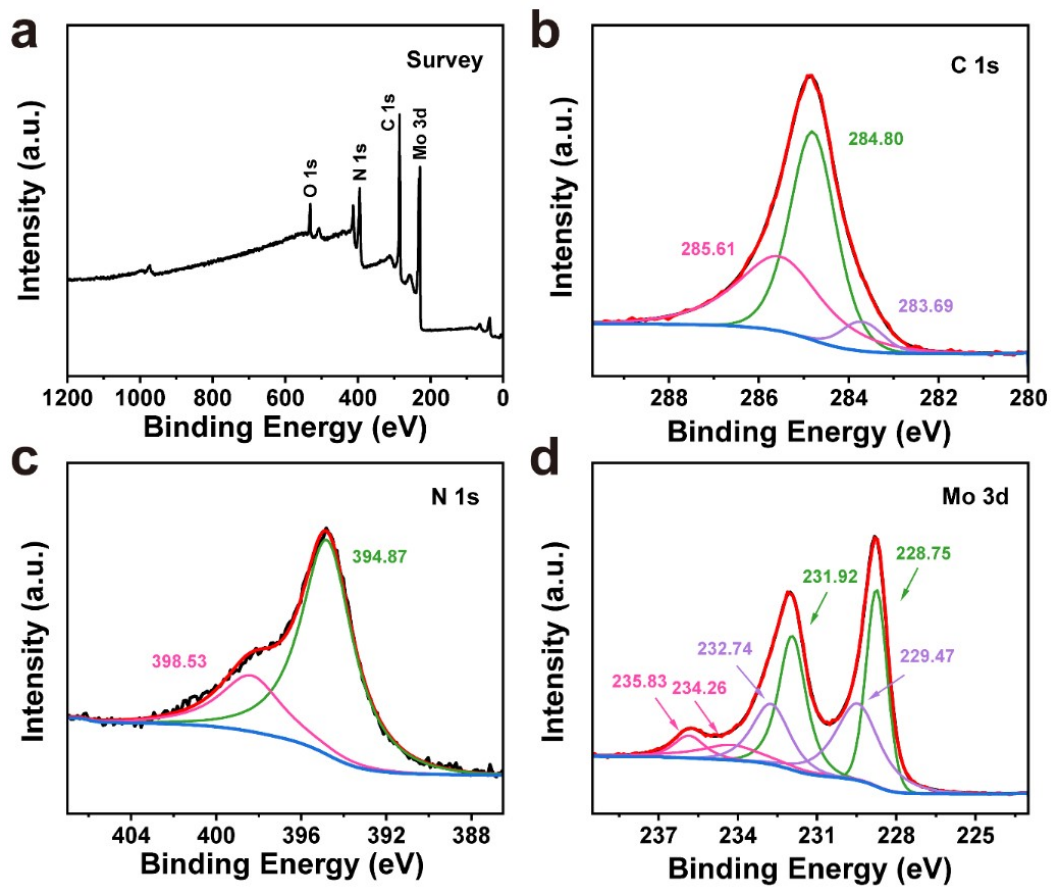

Fig. S5 The XPS spectra of (a) survey, (b) C 1s, (c) N 1s, (d) Mo 3d for MoC@NG.

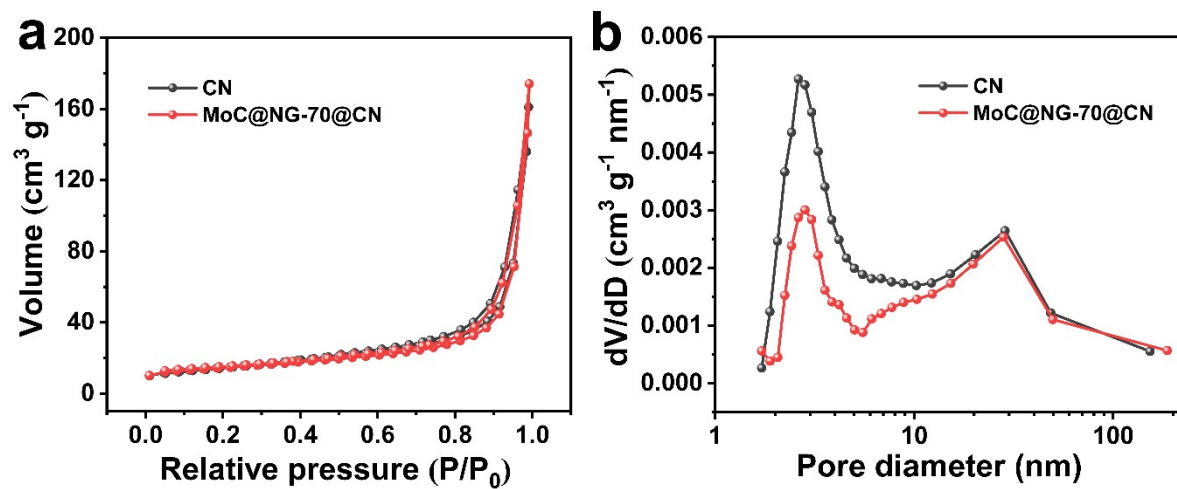

Fig. S6 Textural properties of photocatalysts. (a) N<sub>2</sub> adsorption-desorption isotherms and (b) the pore size distribution curves of CN and MoC@NG-70@CN.

### 3. Tables

Table S1 Textural properties of samples.

| <b>Samples</b>      | <b>S<sub>BET</sub></b><br><b>(m<sup>2</sup> g<sup>-1</sup>)</b> | <b>Pore volume</b><br><b>(cm<sup>3</sup> g<sup>-1</sup>)</b> | <b>Average pore size</b><br><b>(nm)</b> |
|---------------------|-----------------------------------------------------------------|--------------------------------------------------------------|-----------------------------------------|
| <b>CN</b>           | 50.90                                                           | 29.76                                                        | 0.2615                                  |
| <b>MoC@NG-70@CN</b> | 51.58                                                           | 23.04                                                        | 0.2438                                  |

Table S2 List of the photocatalytic hydrogen production performance of photocatalysts in related systems.

| Photocatalyst                               | Sacrificial agent                                              | Cocatalyst/sensitizer | Activity ( $\mu\text{mol g}^{-1} \text{h}^{-1}$ ) | Light source                        | Ref             |
|---------------------------------------------|----------------------------------------------------------------|-----------------------|---------------------------------------------------|-------------------------------------|-----------------|
| CN/CBV <sup>2+</sup>                        | 10 vol% TEOA                                                   | Pt                    | 831.4                                             | 300 W Xe lamp ( $\lambda > 420$ nm) | R <sup>1</sup>  |
| Ni(OH) <sub>2</sub> /CN                     | 10 vol% TEOA                                                   | —                     | 921.4                                             | 300 W Xe lamp ( $\lambda > 400$ nm) | R <sup>2</sup>  |
| KPCN                                        | 10 vol% TEOA                                                   | Pt                    | 1188                                              | 300 W Xe lamp ( $\lambda > 420$ nm) | R <sup>3</sup>  |
| PFNBtBr Pdots/CN                            | 10 vol% TEOA                                                   | —                     | 1200.9                                            | 300 W Xe lamp ( $\lambda > 400$ nm) | R <sup>4</sup>  |
| CNCNT/CN                                    | 10 vol% TEOA                                                   | —                     | 1208                                              | 300 W Xe lamp                       | R <sup>5</sup>  |
| MoNi@MoO <sub>2</sub> /CN                   | 15 vol% TEOA                                                   | —                     | 1359                                              | 300 W Xe lamp ( $\lambda > 400$ nm) | R <sup>6</sup>  |
| CN@HG                                       | 10 vol% TEOA                                                   | —                     | 1430                                              | 350 W Xe lamp ( $\lambda > 420$ nm) | R <sup>7</sup>  |
| B-TiO <sub>2</sub> /CN/MoS <sub>2</sub> QDs | 10 vol% TEOA                                                   | —                     | 1524.37                                           | 300 W Xe lamp simulated solar light | R <sup>8</sup>  |
| FeSe <sub>2</sub> /CN                       | 0.15/0.35 M Na <sub>2</sub> S/Na <sub>2</sub> S O <sub>3</sub> | —                     | 1655.6                                            | 300 W Xe lamp (Microsolar 300UV)    | R <sup>9</sup>  |
| MoC@NC@CN                                   | 15 vol% TEOA                                                   | —                     | 1709                                              | 300 W Xe lamp ( $\lambda > 400$ nm) | R <sup>10</sup> |
| CdS/CN                                      | 14 vol% lactic acid                                            | Pt                    | 1809.07                                           | 300 W Xe lamp ( $\lambda > 420$ nm) | R <sup>11</sup> |

|                                         |                 |    |      |                                          |                 |
|-----------------------------------------|-----------------|----|------|------------------------------------------|-----------------|
| <b>1T-MoS<sub>2</sub> QDs/CN</b>        | 20 vol%<br>TEOA | —  | 1857 | 300 W Xe<br>lamp<br>(AM 1.5 G<br>filter) | R <sup>12</sup> |
| <b>Ag-N<sub>2</sub>C<sub>2</sub>/CN</b> | 10 vol%<br>TEOA | —  | 1866 | 300 W Xe<br>lamp<br>(λ > 400<br>nm)      | R <sup>13</sup> |
| <b>In<sub>2</sub>O<sub>3</sub>/PUCN</b> | 10 vol%<br>TEOA | Pt | 1917 | 300 W Xe<br>lamp<br>(λ > 400<br>nm)      | R <sup>14</sup> |
| <b>WX<sub>y</sub>/CN</b>                | 10 vol%<br>TEOA | —  | 1960 | AM 1.5<br>solar<br>simulator             | R <sup>15</sup> |
| <b>MoC@NG@CN</b>                        | 20 vol%<br>TEOA | Pt | 2109 | 300 W Xe<br>lamp<br>(λ > 400<br>nm)      | This<br>work    |

Table S3 The AQEs of MoC@NG-70@CN at different wavelengths.

| <b>Wavelength<br/>(nm)</b> | <b>400</b> | <b>420</b> | <b>450</b> | <b>500</b> | <b>550</b> |
|----------------------------|------------|------------|------------|------------|------------|
| <b>AQE (%)</b>             | 0.256      | 0.089      | 0.013      | 0.002      | 0.0009     |

Table S4 Exponential decay-fitted parameters of fluorescence lifetimes for CN and MoC@NG-70@CN.

| <b>Samples</b>      | <b><math>\tau_1</math> (ns)</b> | <b><math>A_1</math> (%)</b> | <b><math>\tau_2</math> (ns)</b> | <b><math>A_2</math> (%)</b> | <b><math>\tau_A</math> (ns)</b> |
|---------------------|---------------------------------|-----------------------------|---------------------------------|-----------------------------|---------------------------------|
| <b>CN</b>           | 2.46                            | 50.26                       | 14.00                           | 49.74                       | 12.26                           |
| <b>MoC@NG-70@CN</b> | 2.44                            | 50.85                       | 15.07                           | 49.15                       | 13.26                           |

## References

1. Y.-N. Liu, C.-C. Shen, N. Jiang, Z.-W. Zhao, X. Zhou, S.-J. Zhao and A.-W. Xu, *ACS Catal.*, 2017, **7**, 8228-8234.
2. Q. Hao, Y. Song, Z. Mo, J. Deng, J. Yi, W. El-Alami, H. Xu and H. Li, *Sol. RRL*, 2020, **4**, 1900538.
3. Y. Xu, C. Qiu, X. Fan, Y. Xiao, G. Zhang, K. Yu, H. Ju, X. Ling, Y. Zhu and C. Su, *Appl. Catal., B*, 2020, **268**, 118457.
4. W. Zhou, Z. Hu, F. Huang, W. Hong and X. Chen, *Appl. Catal., B*, 2020, **270**, 118852.
5. Q. Liu, C. Zeng, Z. Xie, L. Ai, Y. Liu, Q. Zhou, J. Jiang, H. Sun and S. Wang, *Appl. Catal., B*, 2019, **254**, 443-451.
6. J. Xu, Q. Ji, X. Yan, C. Wang and L. Wang, *Appl. Catal., B*, 2020, **268**, 118739.
7. Z. Lin, C. Shao, S. Jiang, C. Sun and S. Song, *Appl. Catal., B*, 2020, **268**, 118742.
8. J. Pan, Z. Dong, Z. Jiang, C. Zhao, B. Wang, W. Zhao, J. Wang, C. Song, Y. Zheng and C. Li, *Sol. RRL*, 2019, **3**, 1900337.
9. J. Jia, W. Sun, Q. Zhang, X. Zhang, X. Hu, E. Liu and J. Fan, *Appl. Catal., B*, 2020, **261**, 118249.
10. X. Zhou, Y. Tian, J. Luo, B. Jin, Z. Wu, X. Ning, L. Zhan, X. Fan, T. Zhou, S. Zhang and X. Zhou, *Adv. Funct. Mater.*, 2022, **32**, 2201518.
11. Z. Wang, Z. Wang, X. Zhu, C. Ai, Y. Zeng, W. Shi, X. Zhang, H. Zhang, H. Si, J. Li, C.-Z. Wang and S. Lin, *Small*, 2021, **17**, 2102699.
12. Z. Liang, B. Sun, X. Xu, H. Cui and J. Tian, *Nanoscale*, 2019, **11**, 12266-12274.
13. X.-H. Jiang, L.-S. Zhang, H.-Y. Liu, D.-S. Wu, F.-Y. Wu, L. Tian, L.-L. Liu, J.-P. Zou, S.-L. Luo and B.-B. Chen, *Angew. Chem., Int. Ed.*, 2020, **59**, 23112-23116.
14. W. Wang, X. Bai, Q. Ci, L. Du, X. Ren and D. L. Phillips, *Adv. Funct. Mater.*, 2021, **31**, 2103978.
15. M. Shao, W. Chen, S. Ding, K. H. Lo, X. Zhong, L. Yao, W. F. Ip, B. Xu, X. Wang and



H. Pan, *ChemSusChem*, 2019, **12**, 3355-3362.
